# Supplementary material for: 1,28-Di[(cholest-5-en-3&beta;-yl)disulfanyl]-4,25-dioxo-3,8,12,17,21,26-hexaazaoctacosane tetrahydrochloride
Source: Preprints.org preprint supplement (doi:10.20944/preprints201801.0087.v1), 2018-01-10
Supplement: Supplementary file 1 [file supplementary]

## SUPPORTING INFORMATION

### **1,28-Di[(cholest-5-en-3 $\beta$ -yl)disulphanyl]-4,25-dioxo-3,8,12,17,21,26-hexaazaoctacosane tetrahydrochloride**

Pavel A. Puchkov<sup>a</sup>, Elena V. Shmendel<sup>a</sup>, Valeria D. Andreeva<sup>a</sup>, Nina G. Morozova<sup>a</sup>, Marina A. Zenkova<sup>b</sup>  
and Mikhail A. Maslov<sup>a,\*</sup>

<sup>a</sup> Institute of Fine Chemical Technologies, Moscow Technological University, Vernadsky ave. 86, 119571  
Moscow, Russia

<sup>b</sup> Institute of Chemical Biology and Fundamental Medicine SB RAS, Lavrentiev ave. 8, 630090  
Novosibirsk, Russia

\*Corresponding author. *E-mail address*: [mamaslov@mail.ru](mailto:mamaslov@mail.ru)

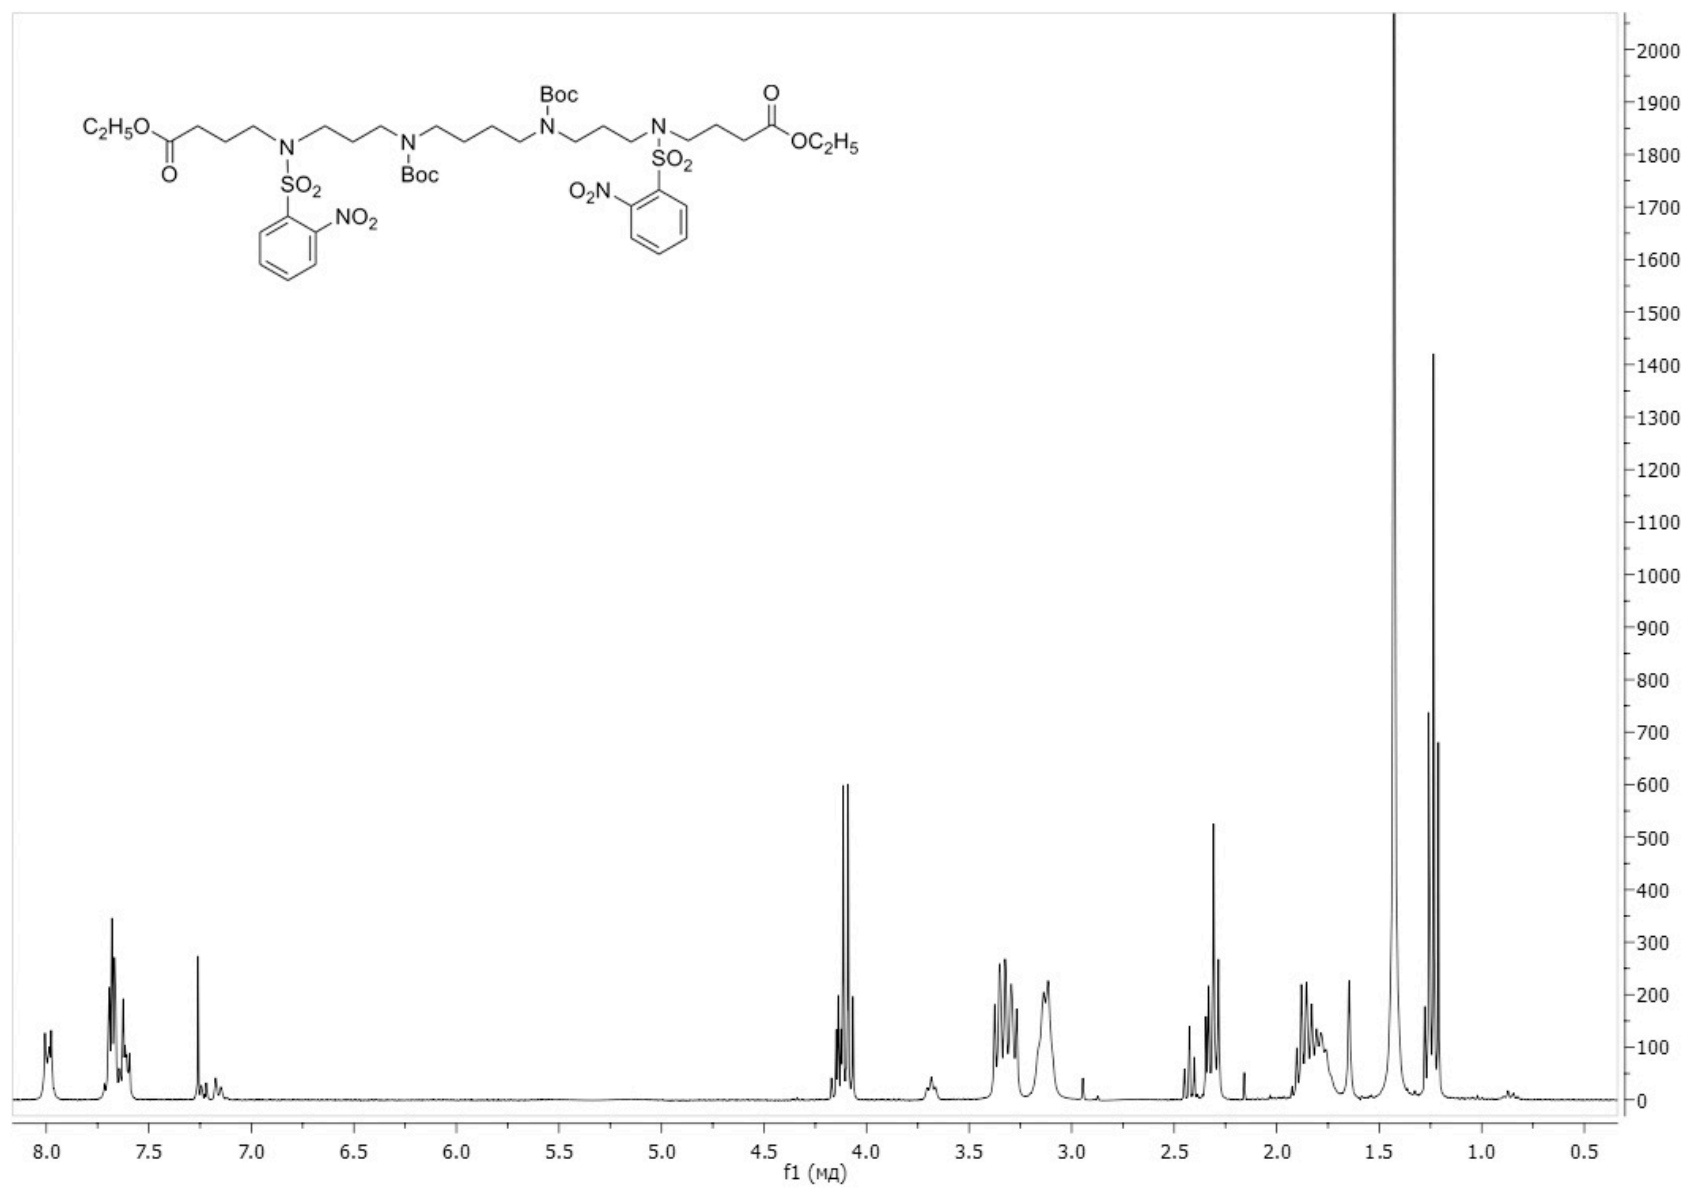

**Fig. S1. <sup>1</sup>H NMR spectrum of 2.**

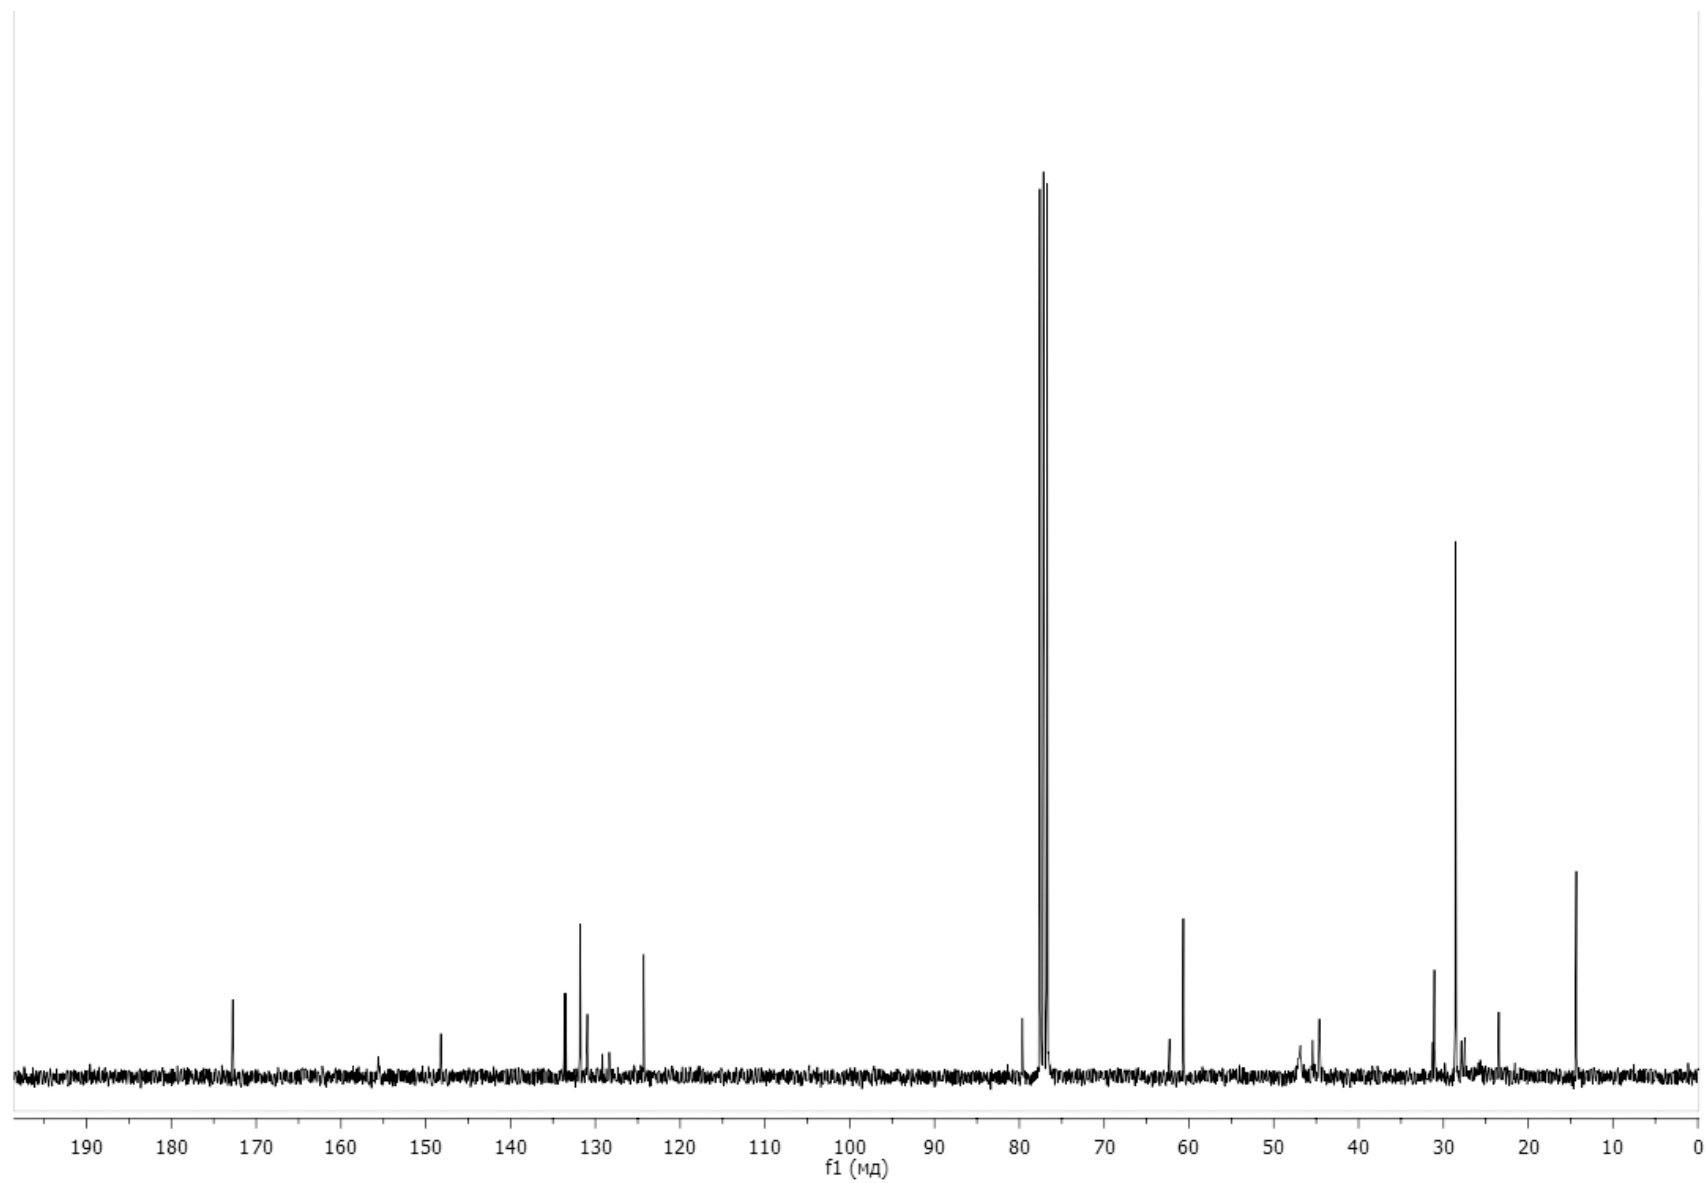

**Fig. S2.  $^{13}\text{C}$  NMR spectrum of 2.**

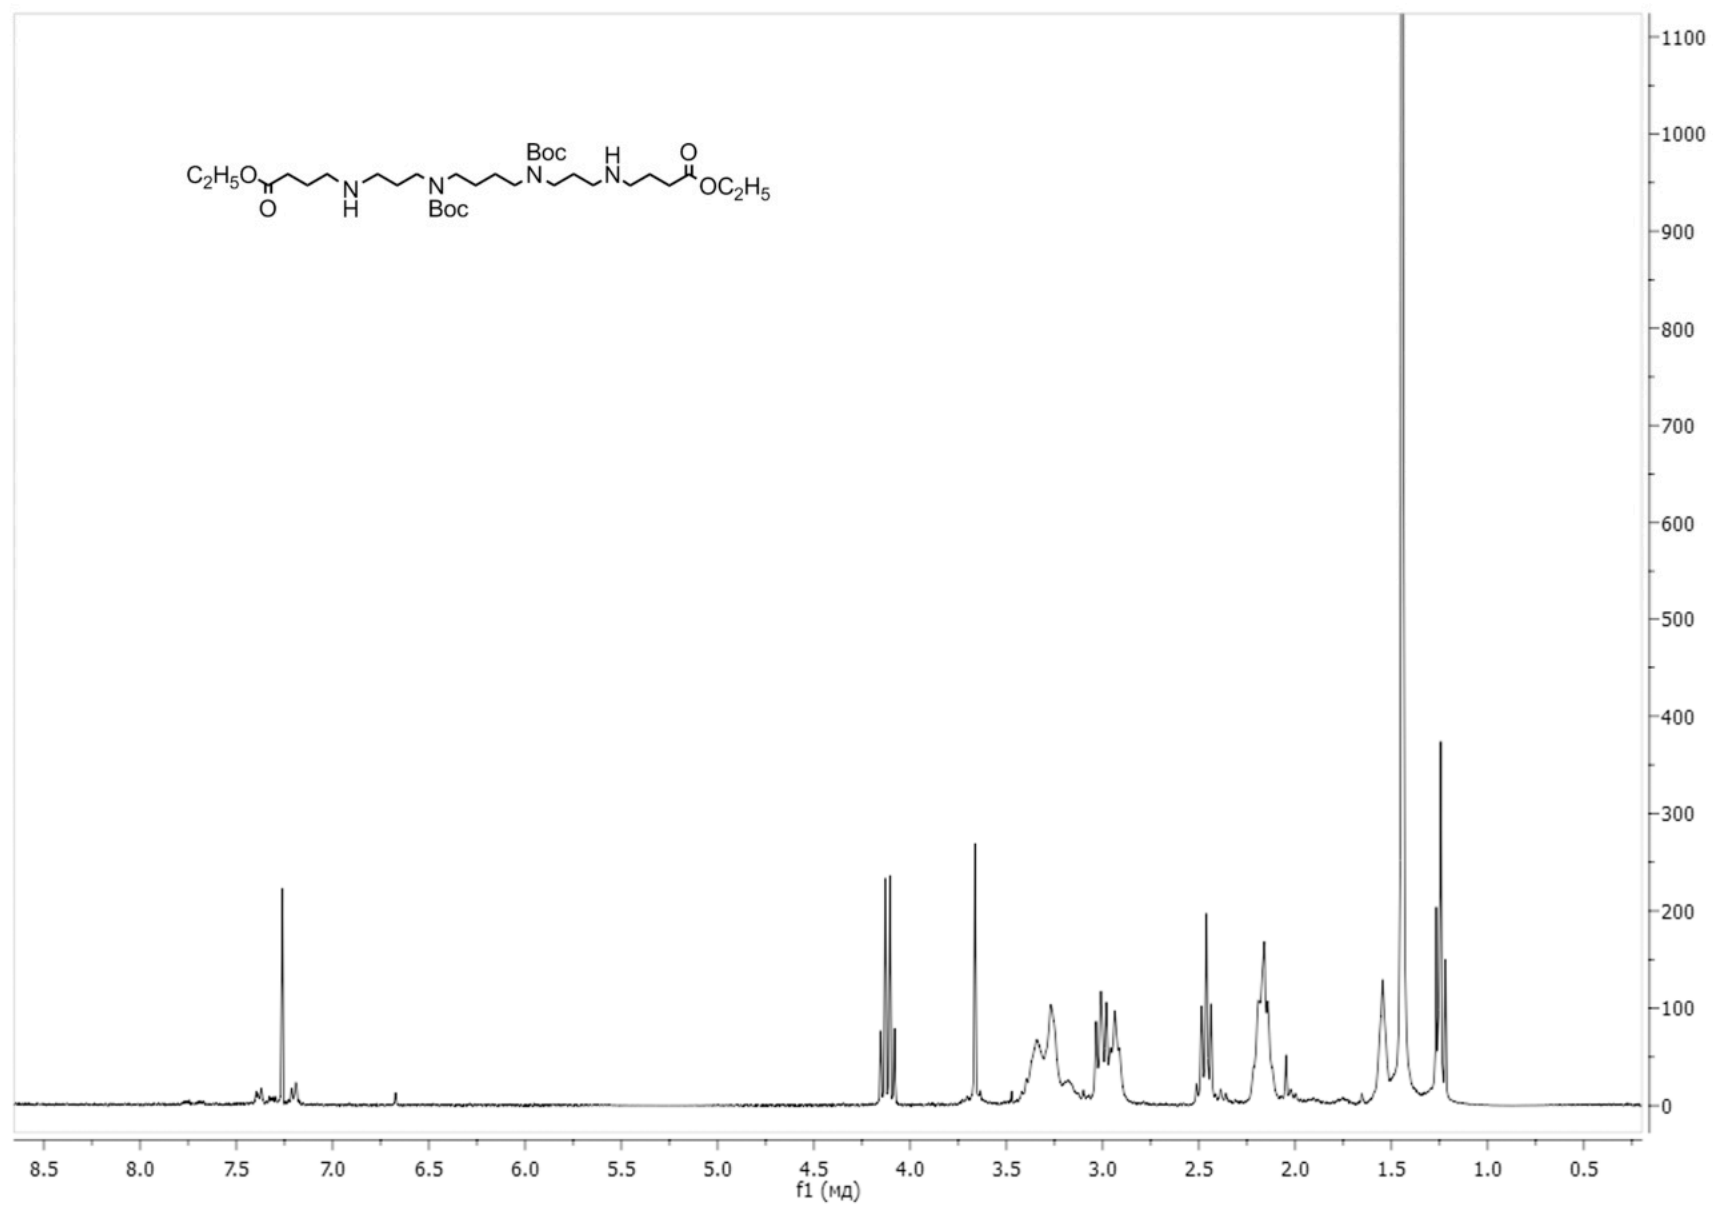

Fig. S3. <sup>1</sup>H NMR spectrum of 3.

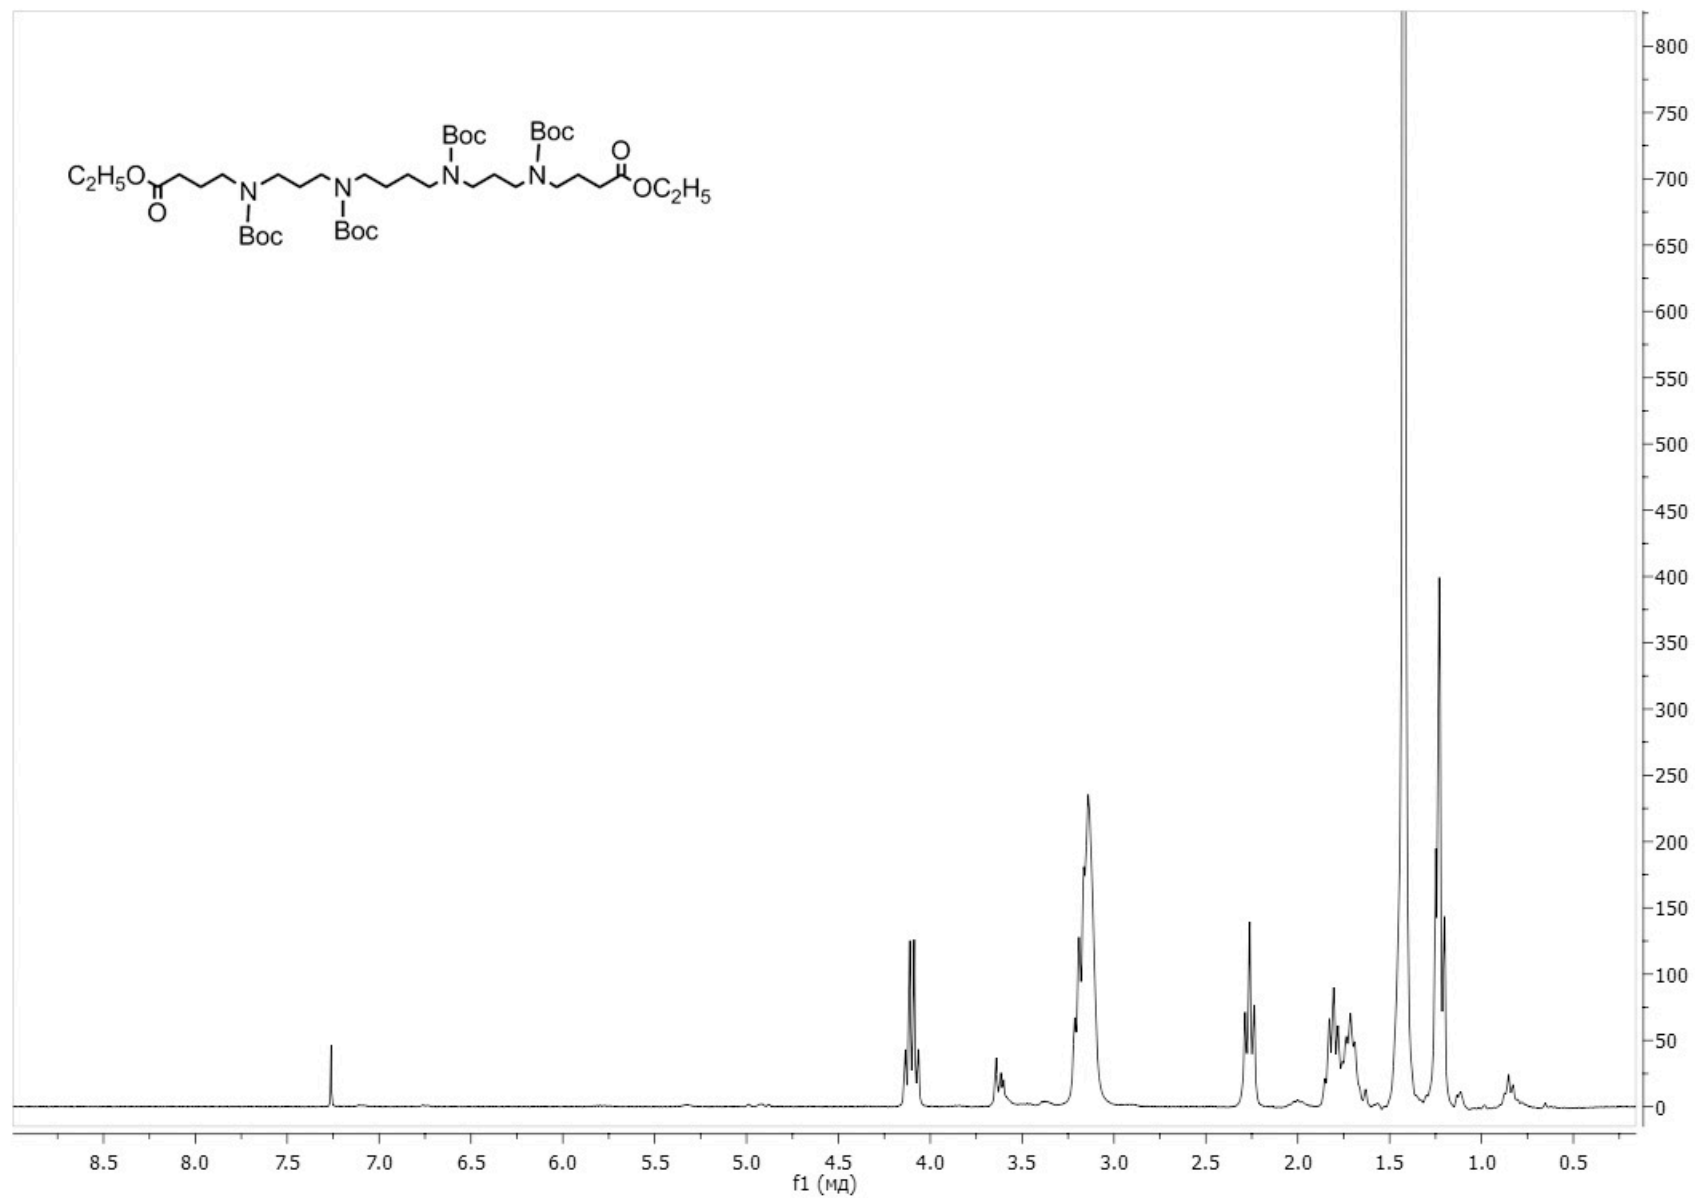

**Fig. S4.  $^1\text{H}$  NMR spectrum of 4.**

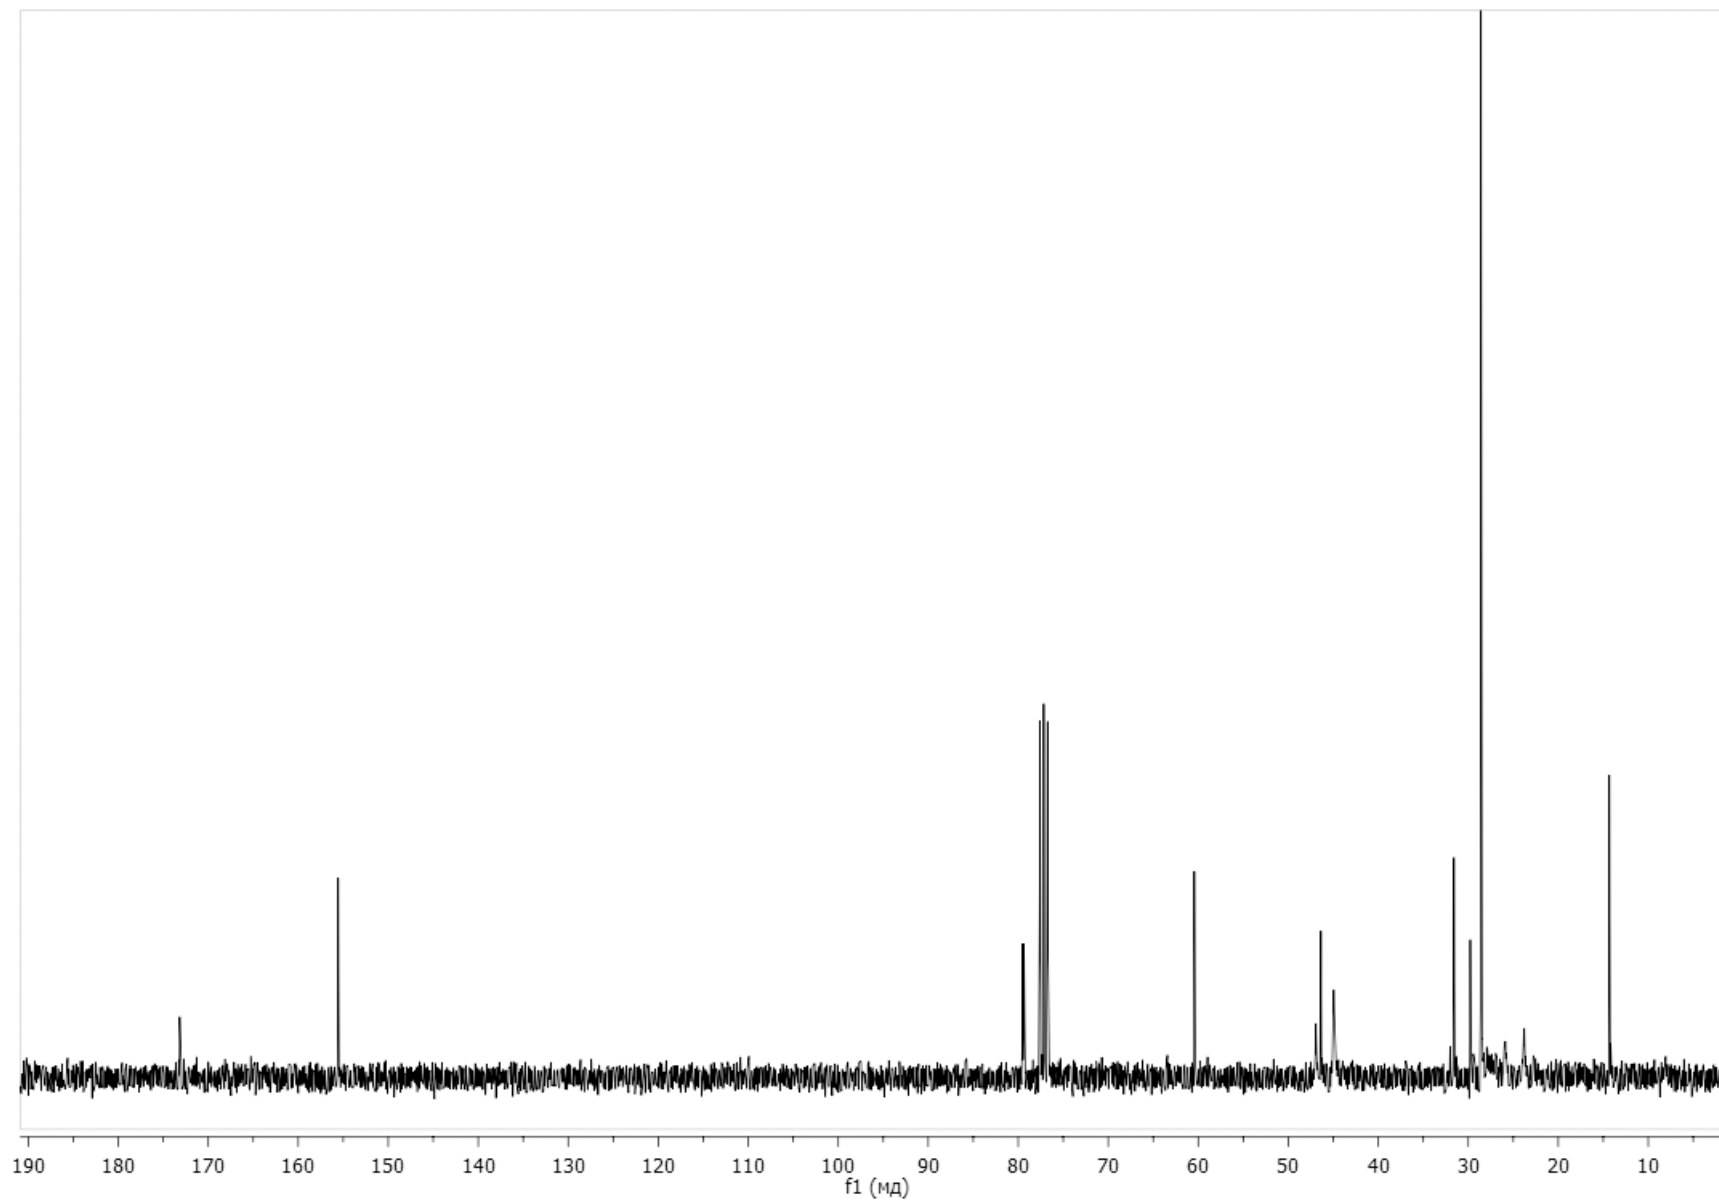

**Fig. S5.  $^{13}\text{C}$  NMR spectrum of 4.**

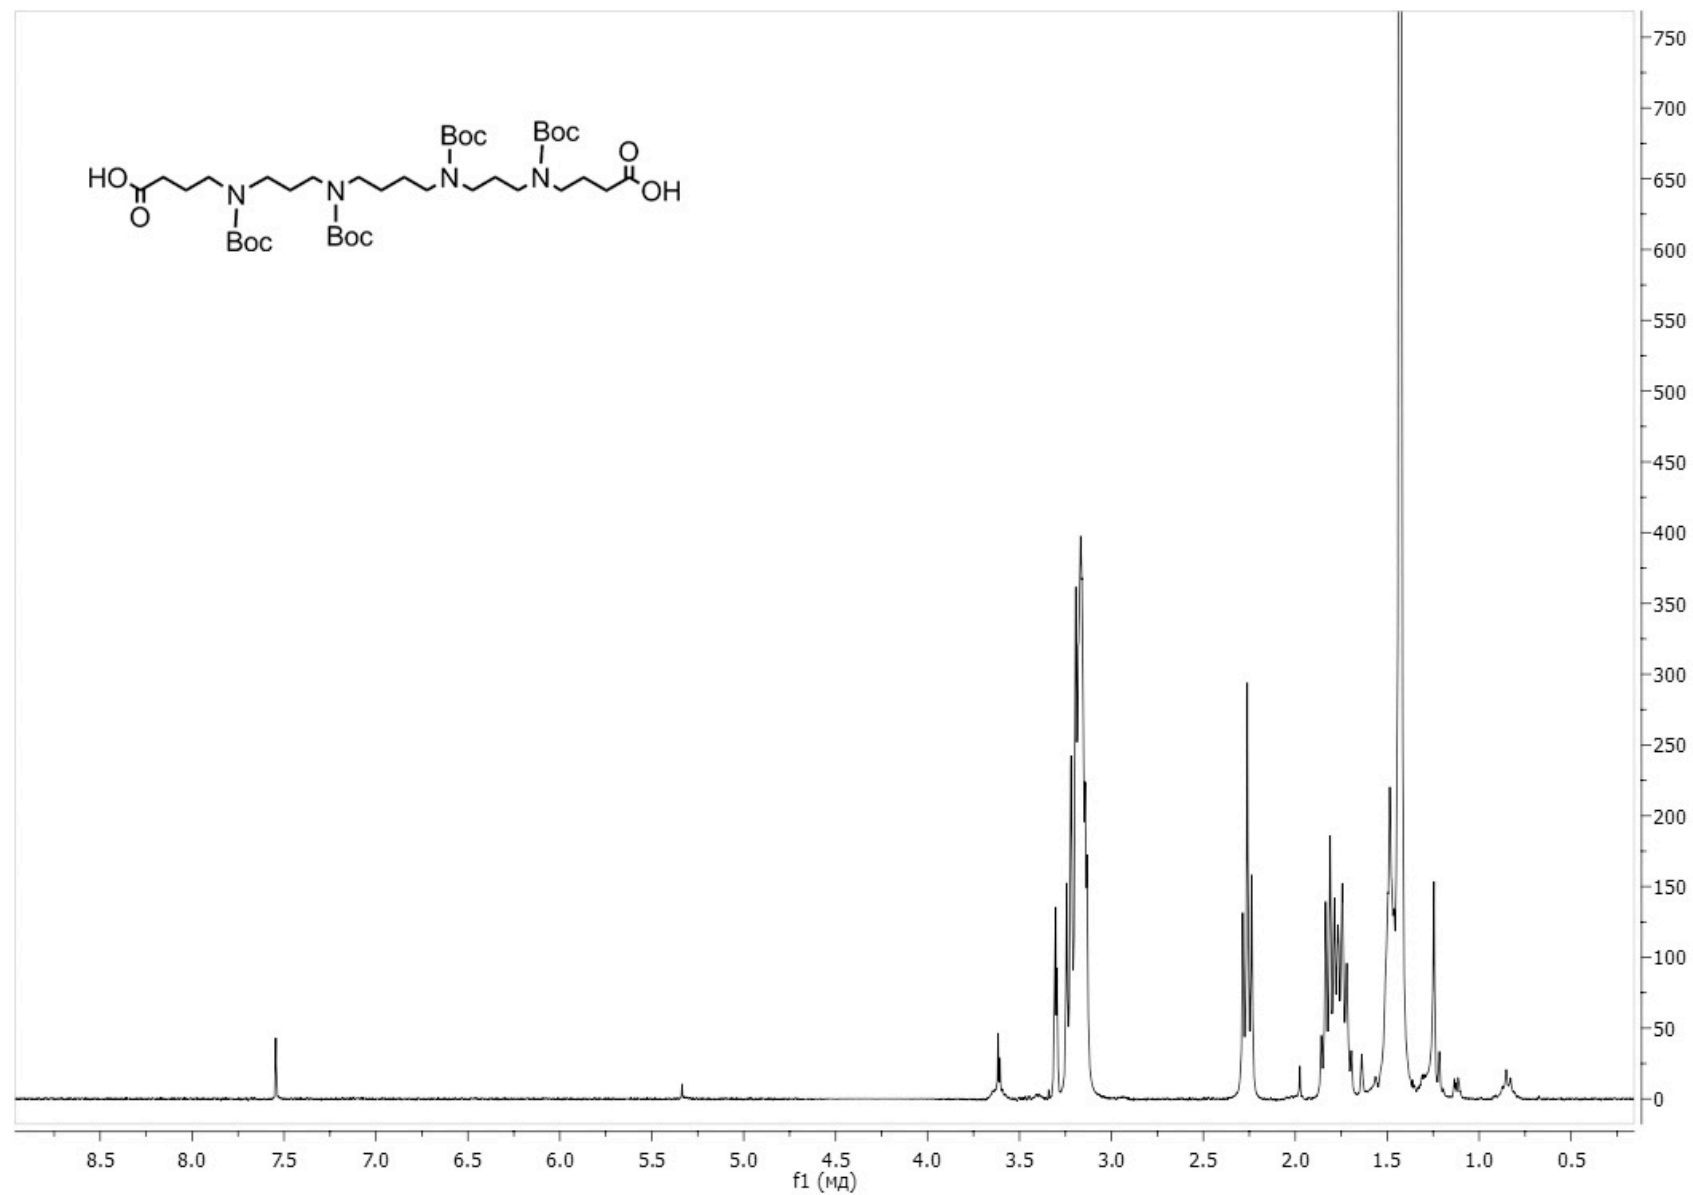

**Fig. S6.** <sup>1</sup>H NMR spectrum of 5.

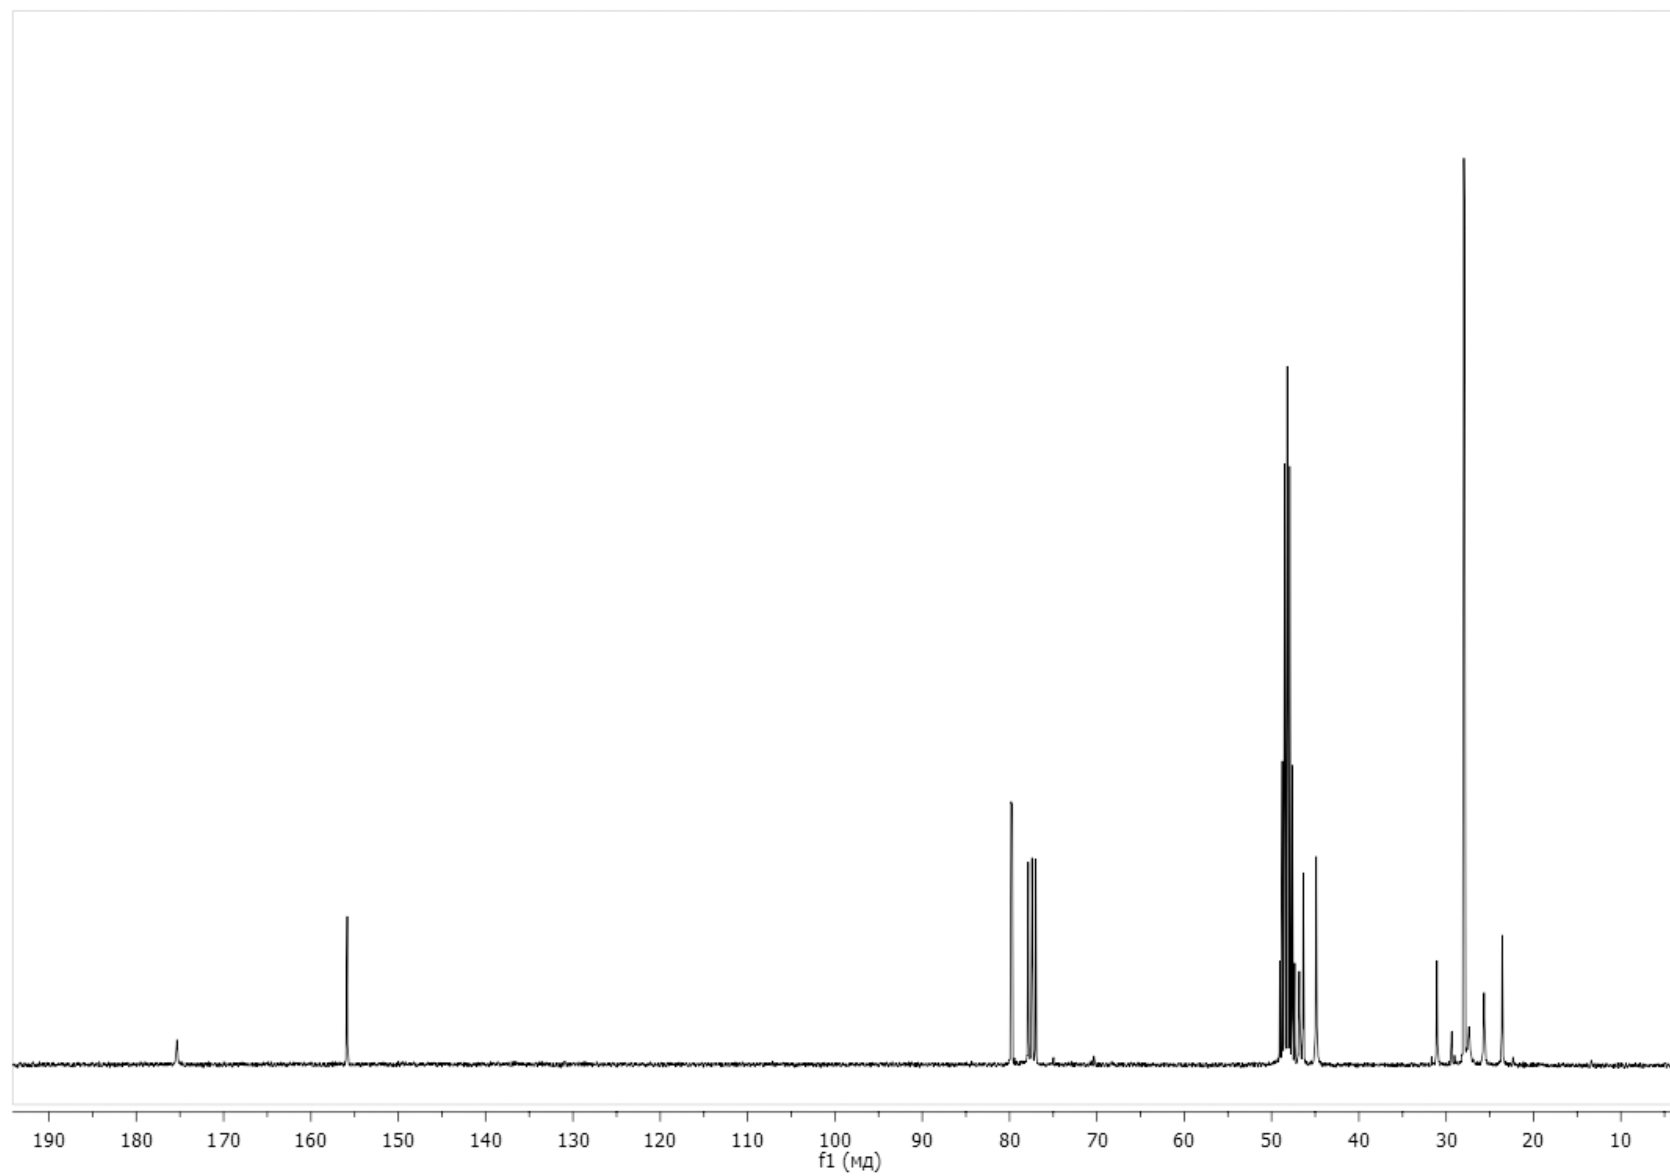

**Fig. S7.  $^{13}\text{C}$  NMR spectrum of 5.**



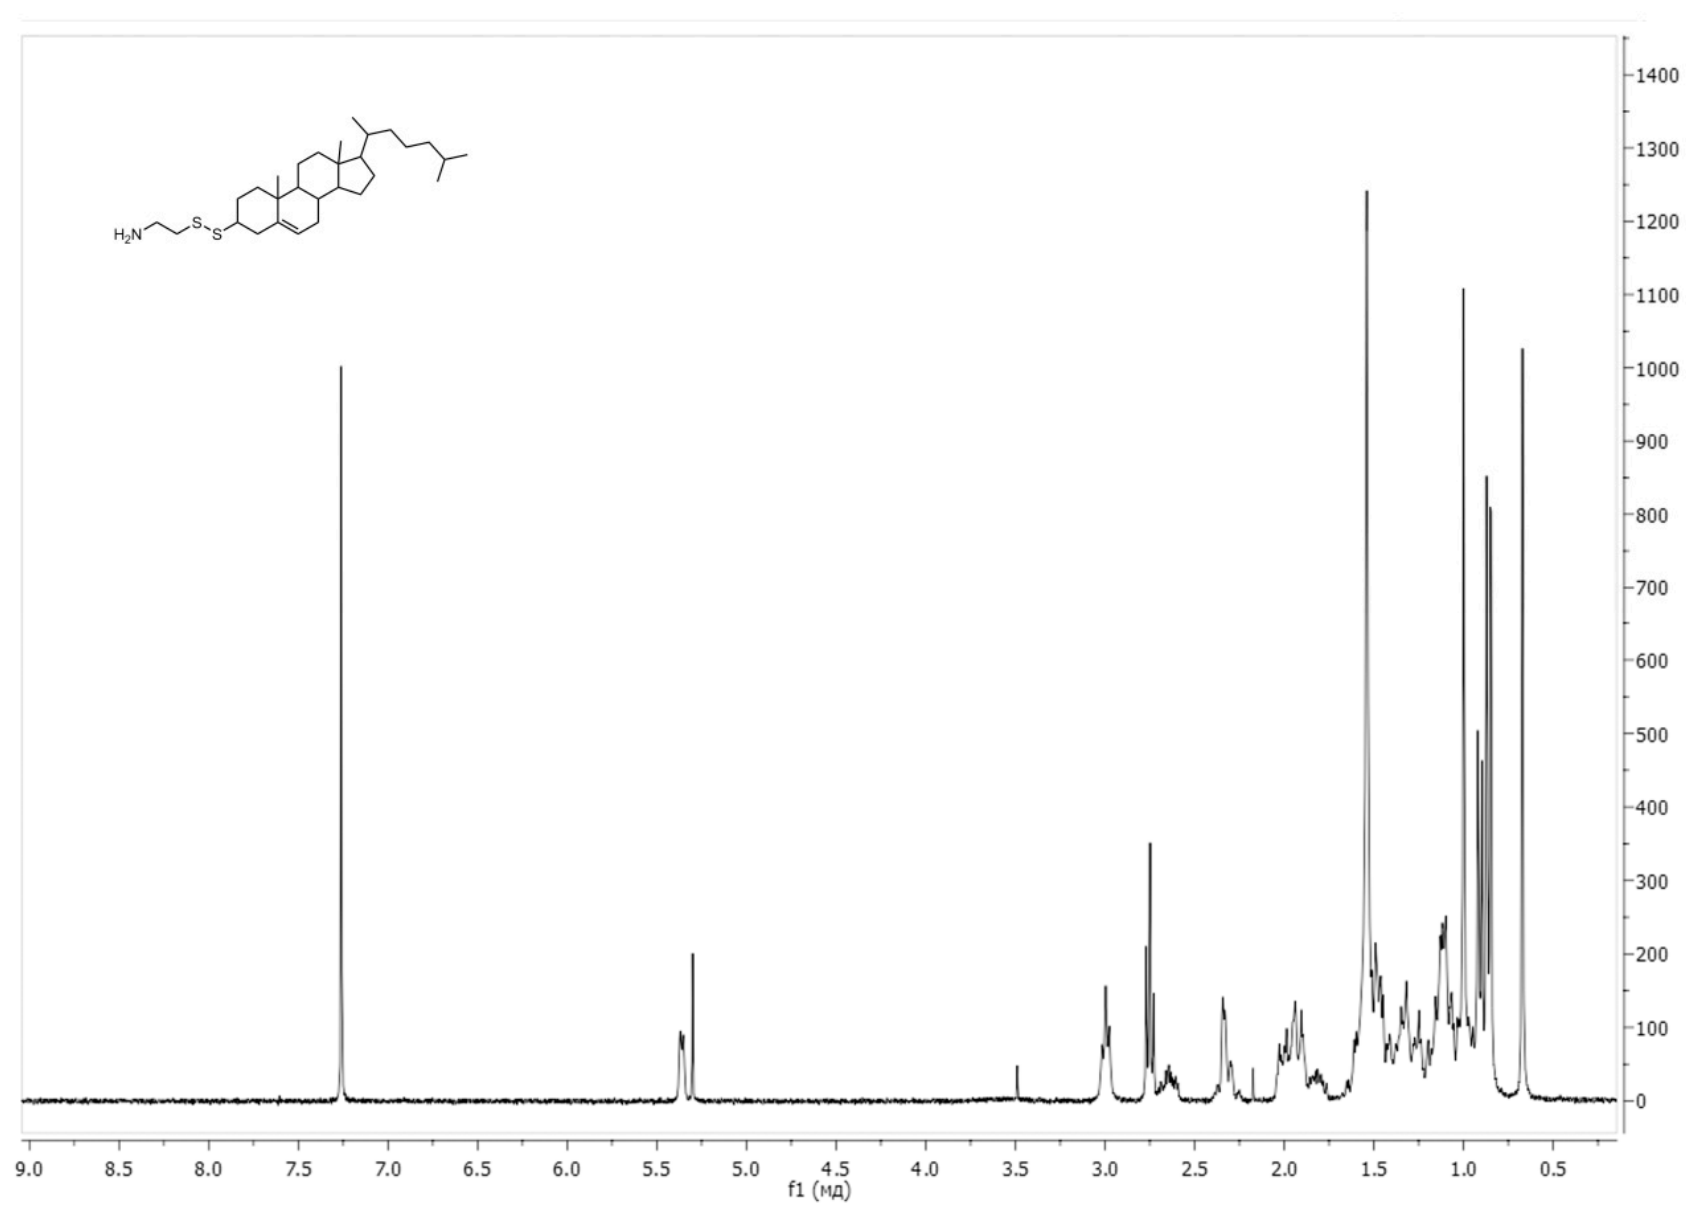

**Fig. S8.** <sup>1</sup>H NMR spectrum of 8.

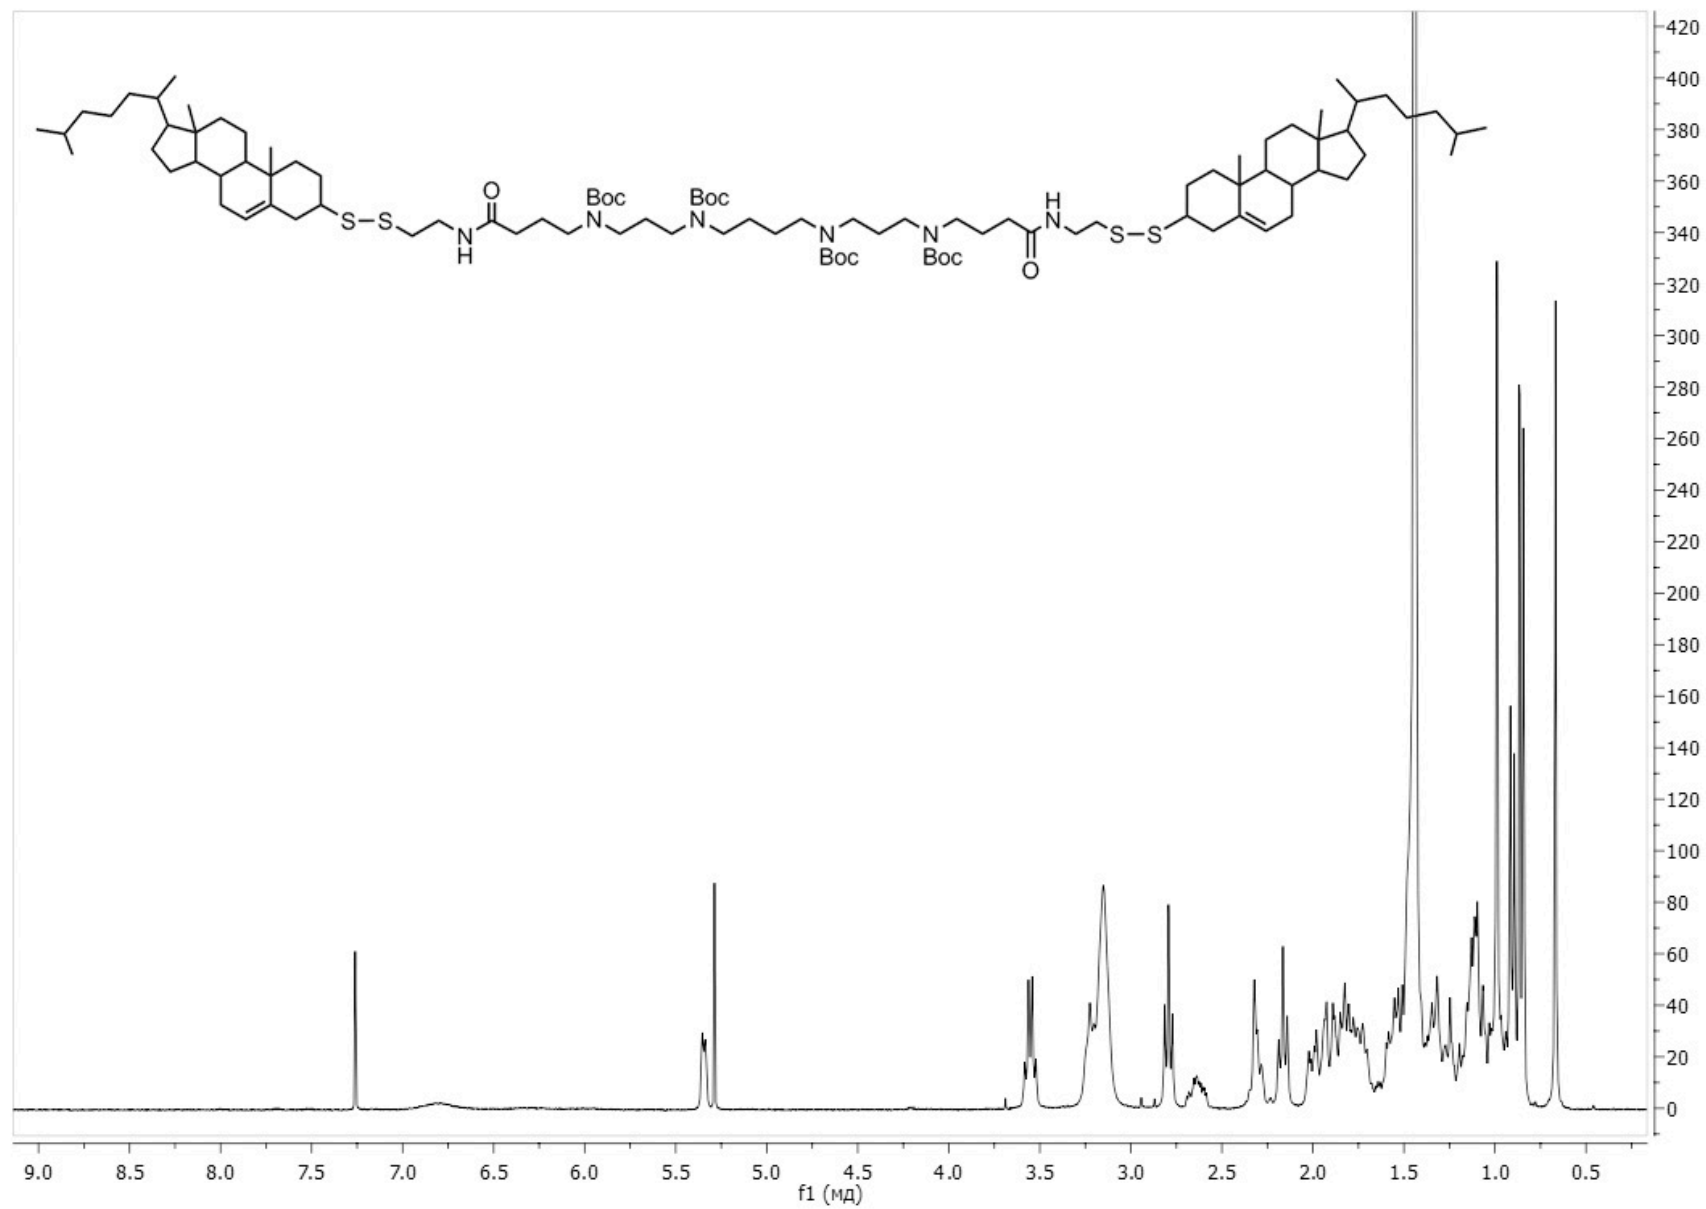

**Fig. S9.** <sup>1</sup>H NMR spectrum of 9.

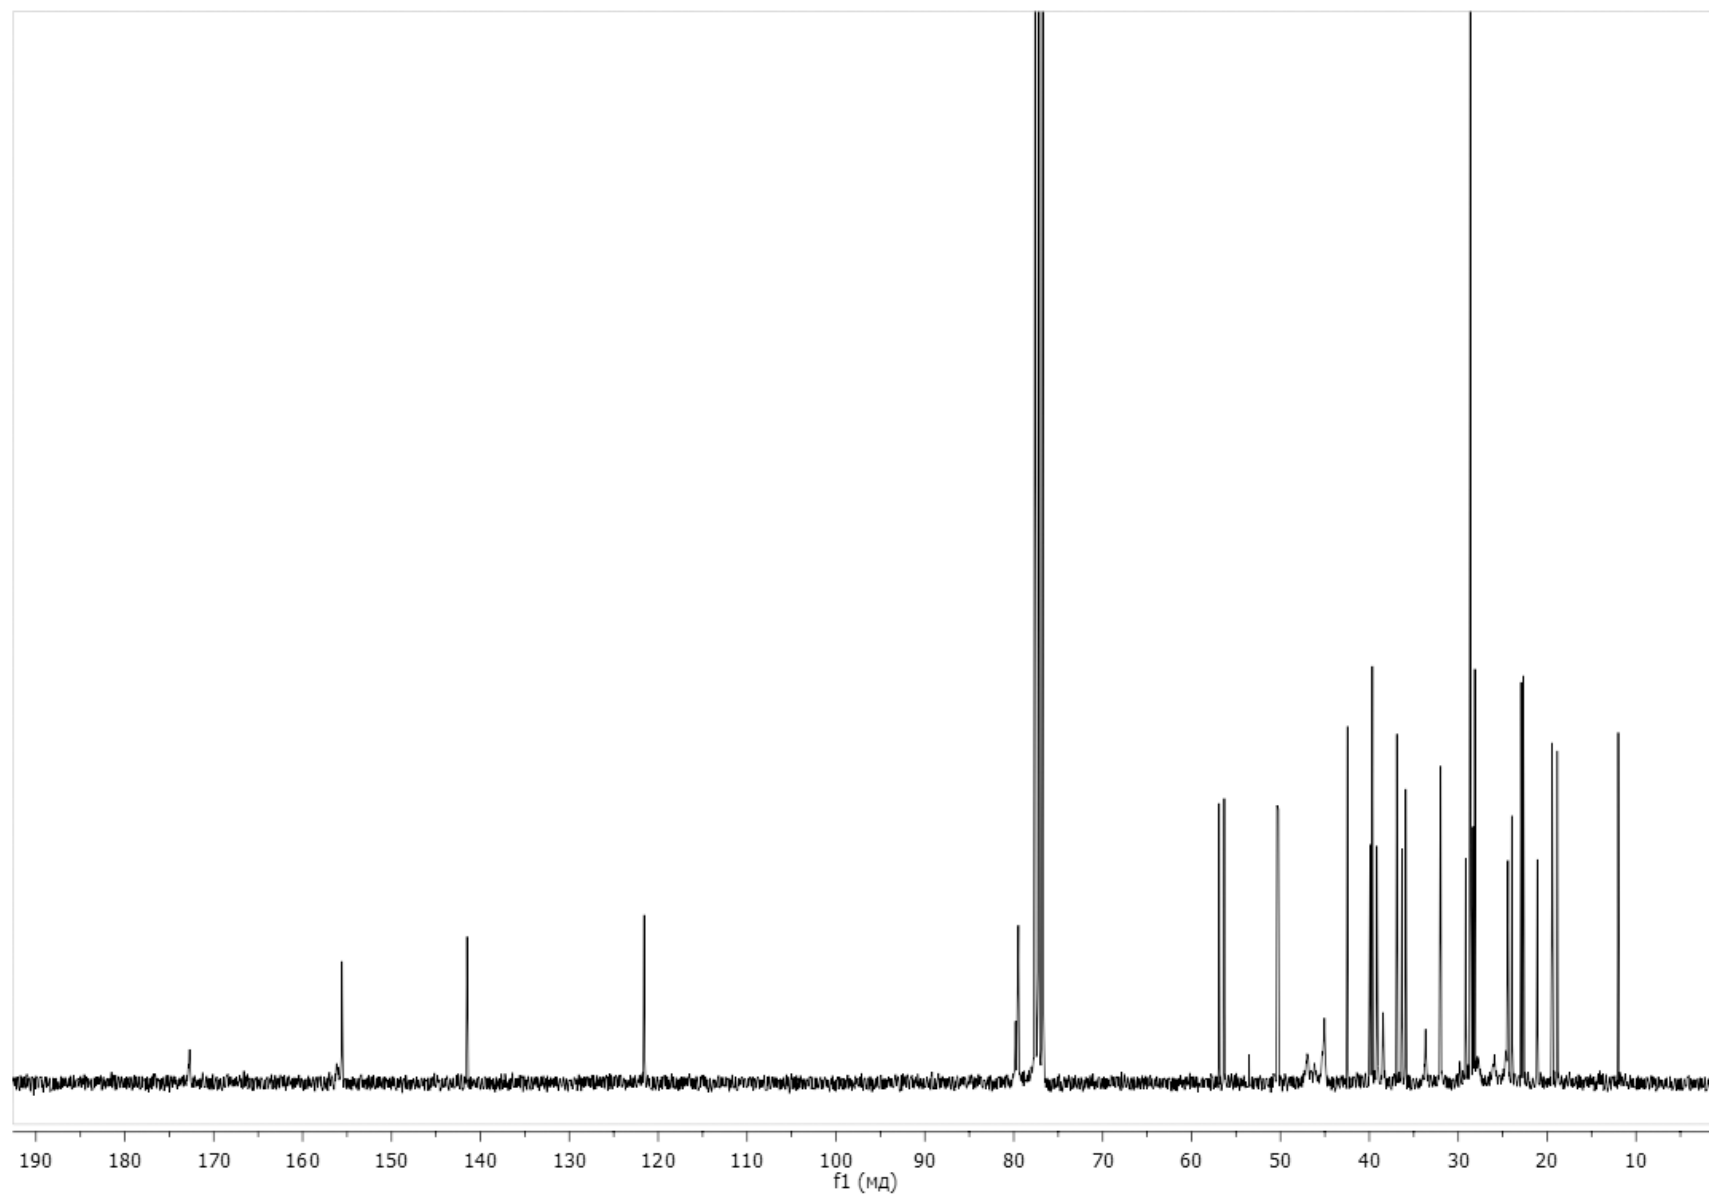

**Fig. S10.  $^{13}\text{C}$  NMR spectrum of 9.**

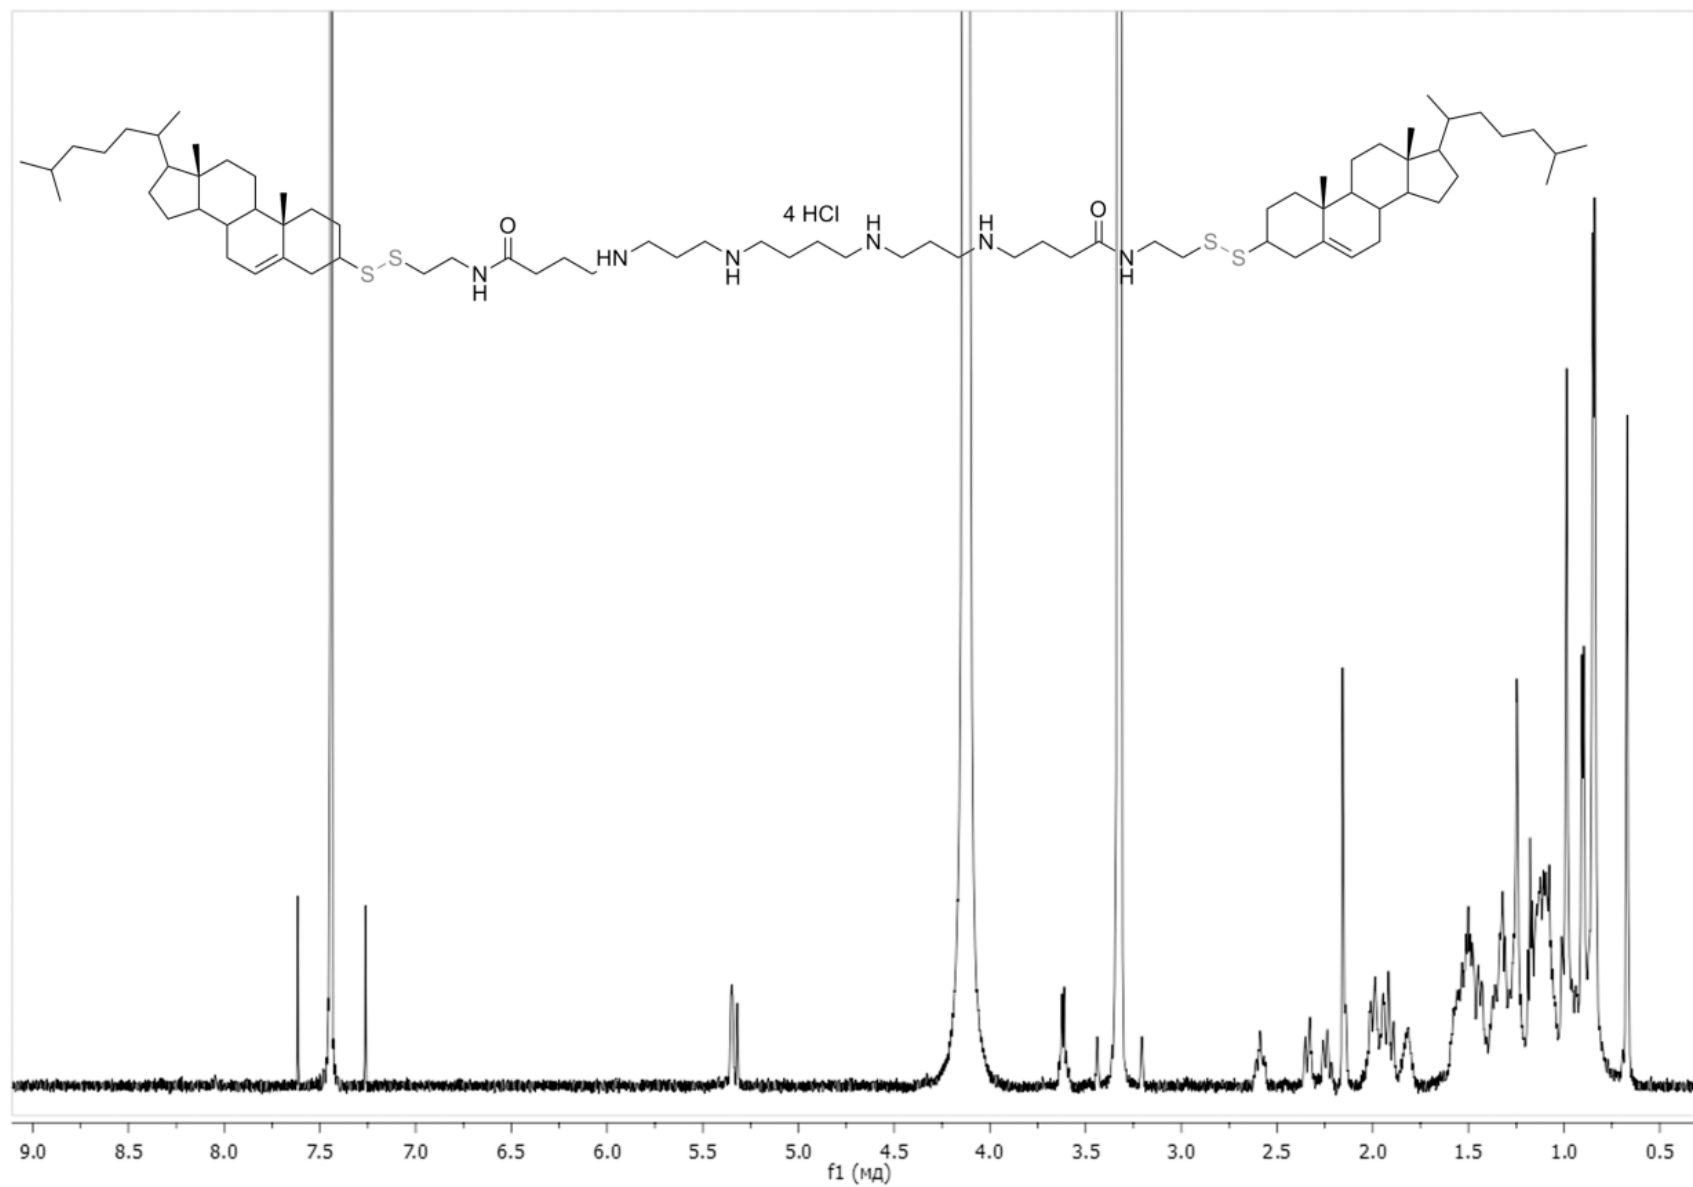

**Fig. S11.  $^1\text{H}$  NMR spectrum of 2S4.**

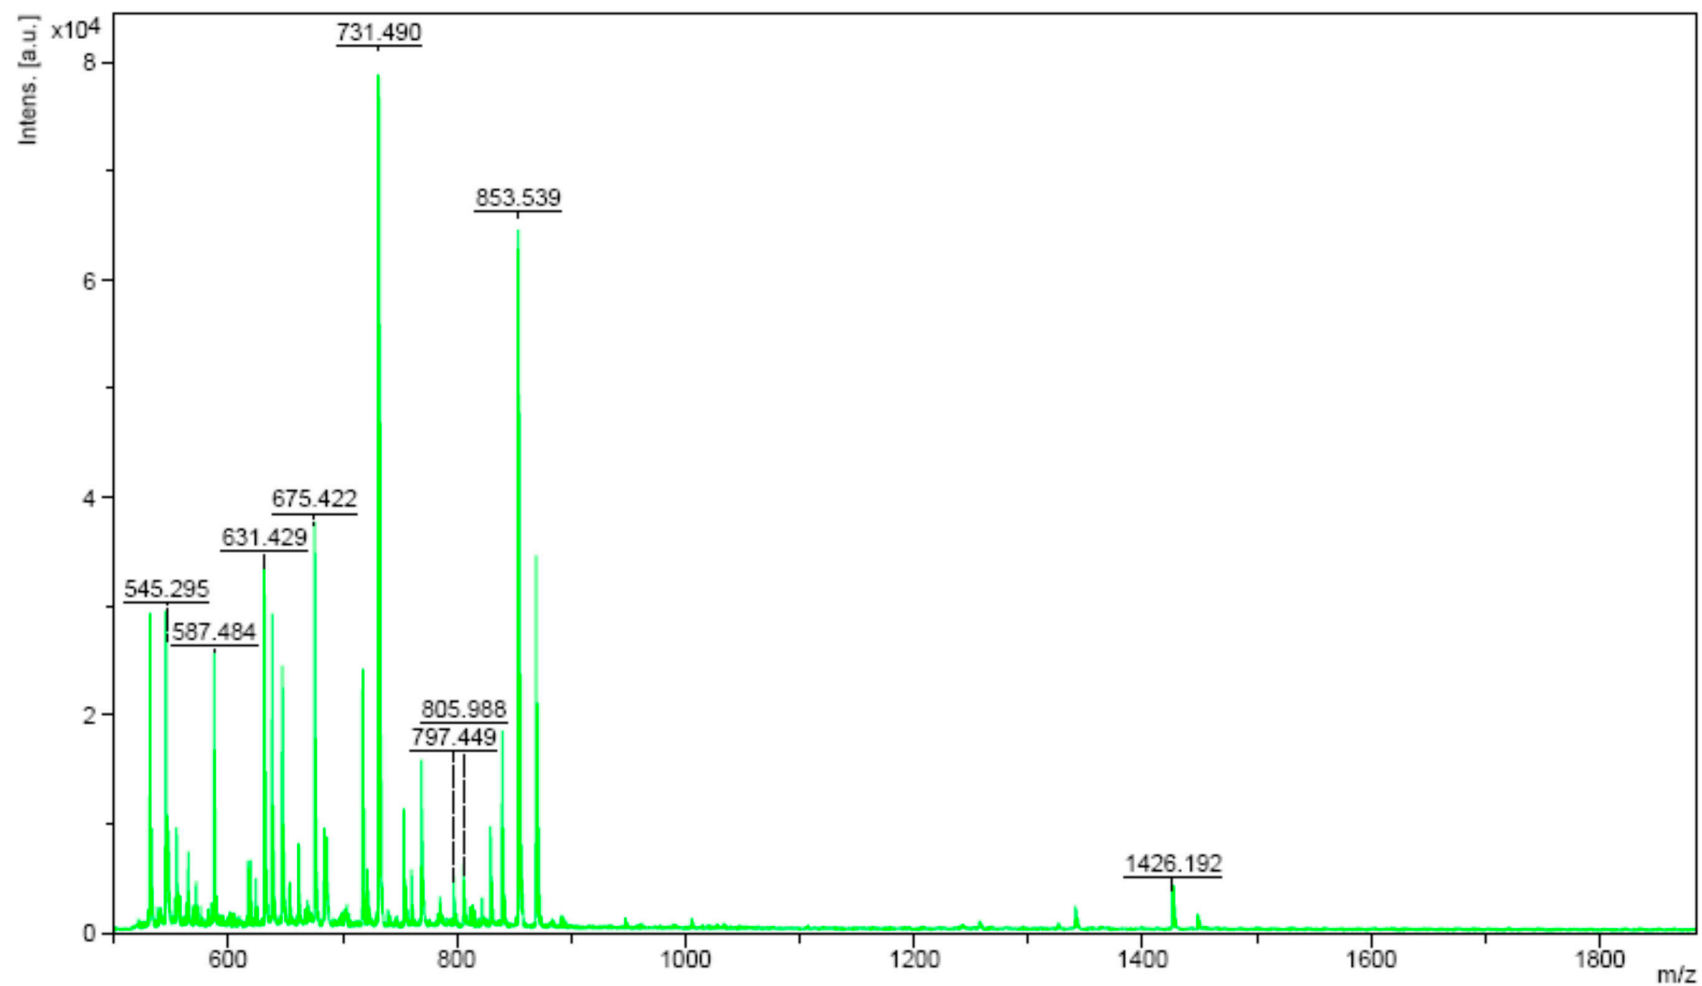

Fig. S12. MS of 4.

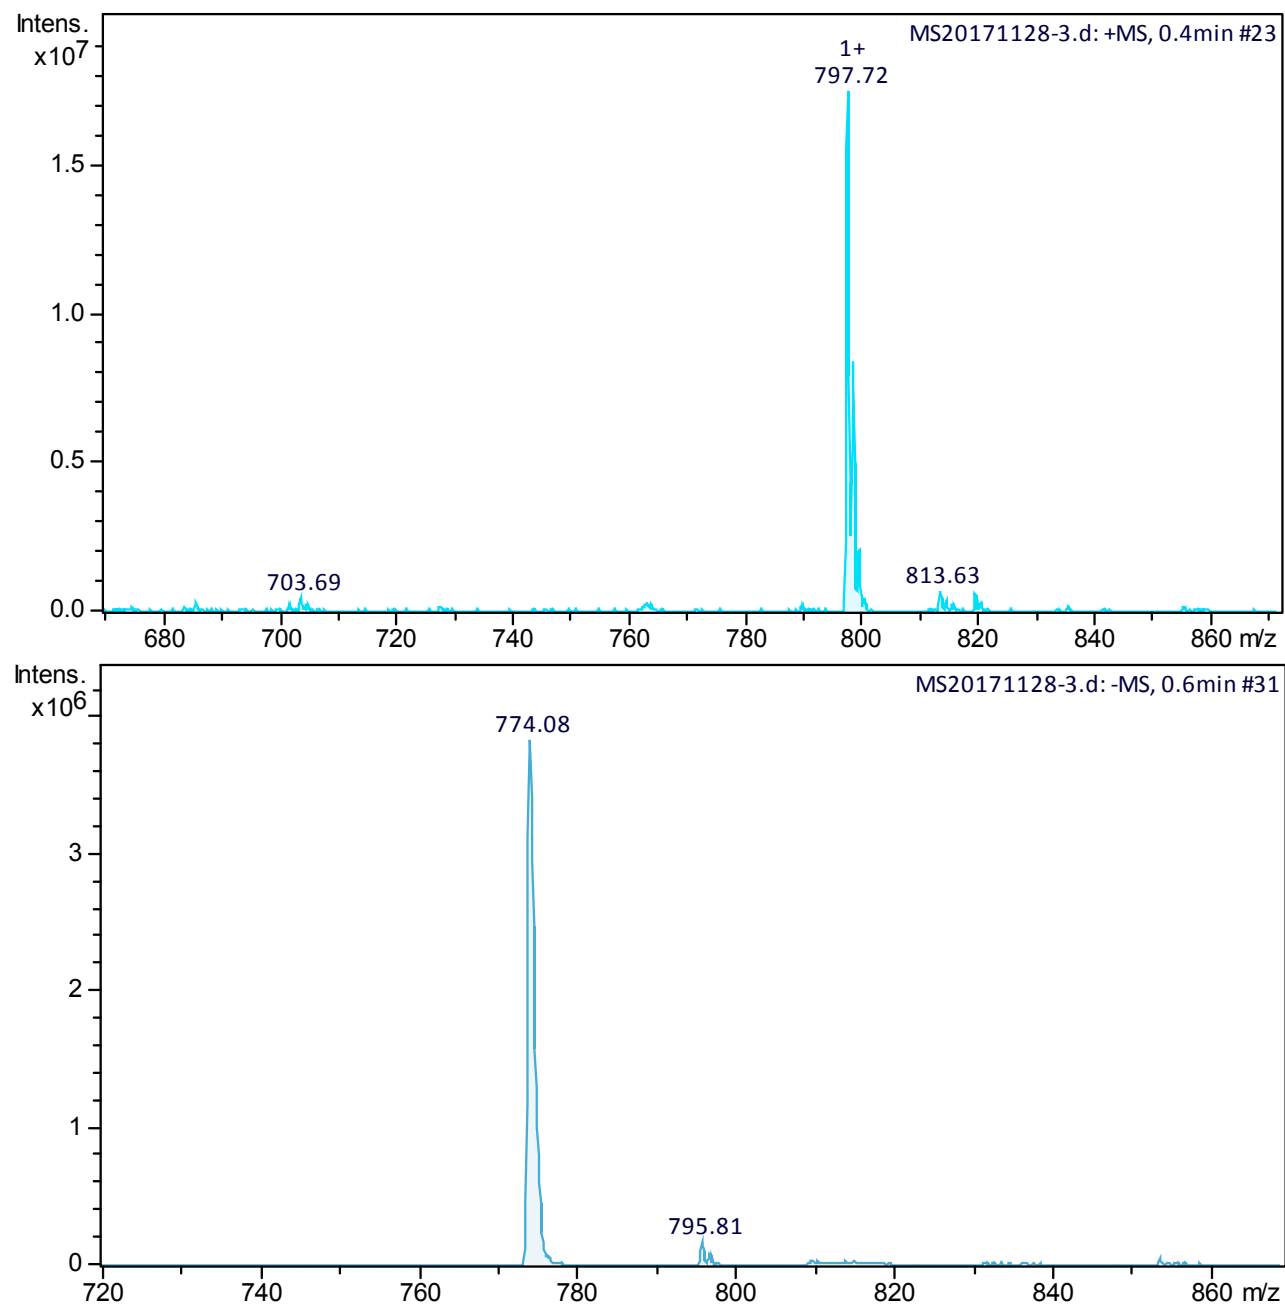

**Fig. S13. MS of 5.**

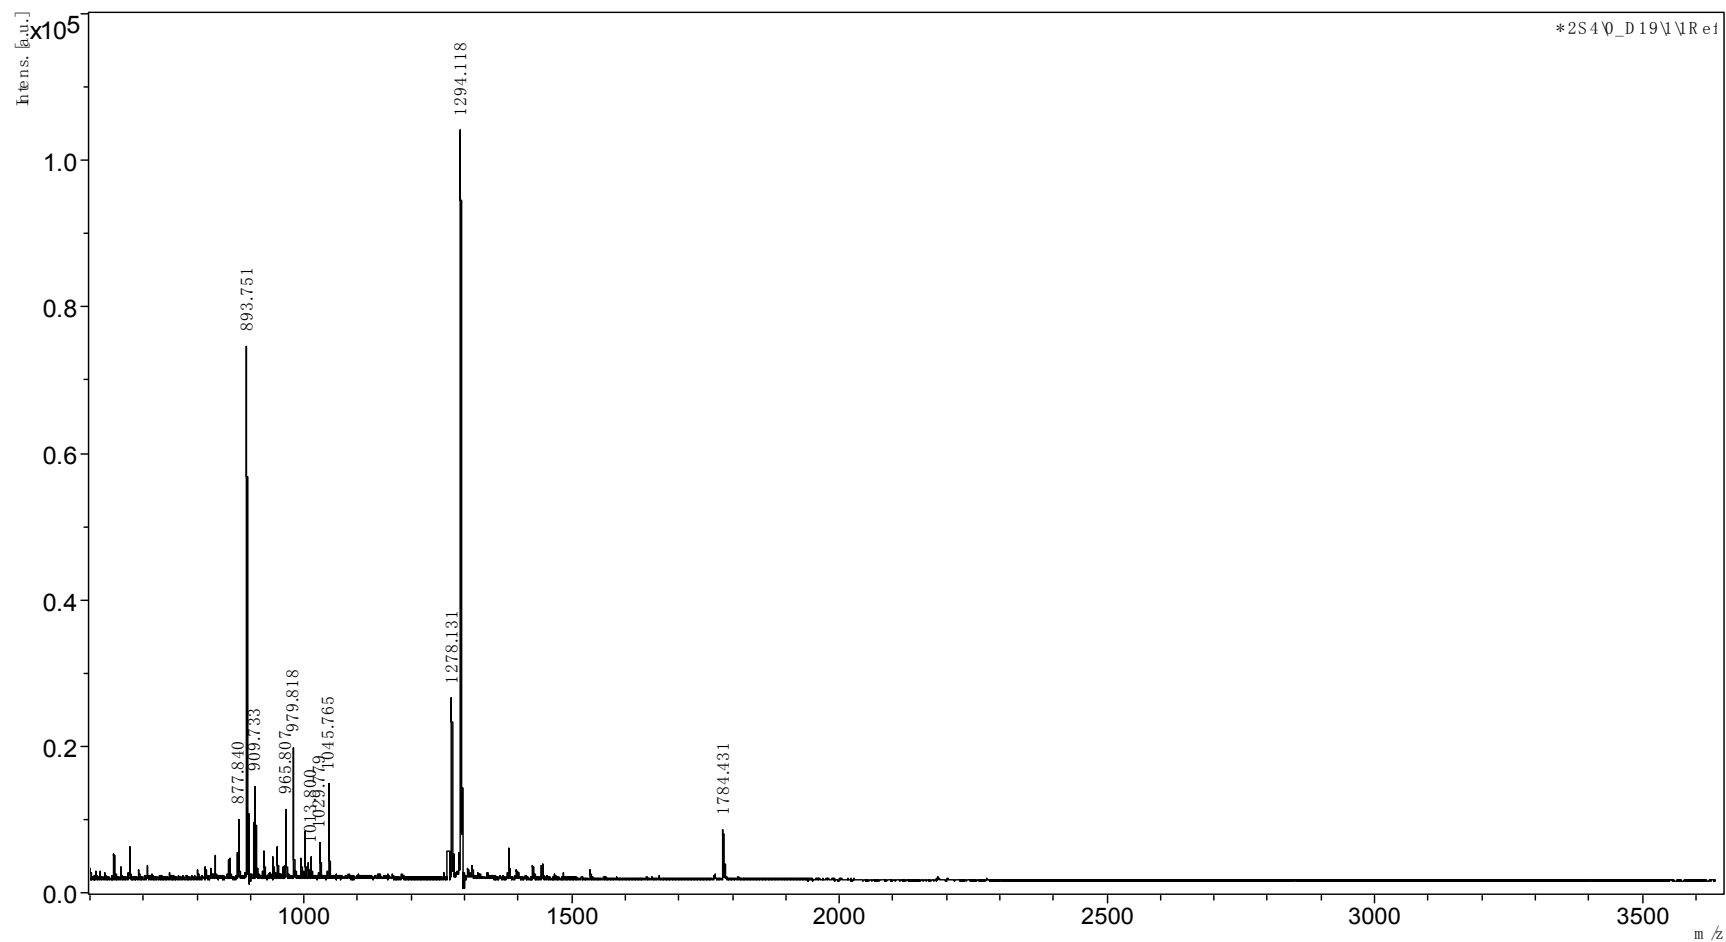

**Fig. S14. MS of 2S4.**
